# Supplementary material for: A 5+1 assemble-to-activate mechanism of the Lon proteolytic machine
Source: PubMed Central journal article supplement (PMC10643698; doi:10.1038/s41467-023-43035-2), 2023-11-13
Supplement: 41467_2023_43035_MOESM1_ESM.pdf [file 41467_2023_43035_MOESM1_ESM.pdf]

## Supplementary Information

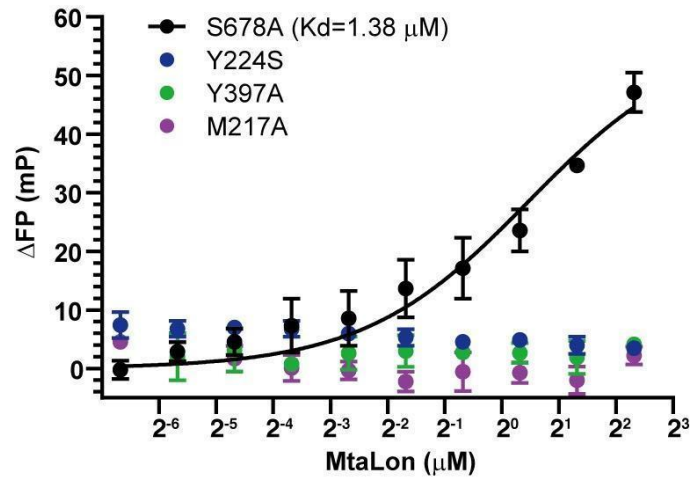

**Supplementary Fig. 1: Identification of MtaLon mutants with no substrate-binding activity.** Fluorescence polarization (FP) of the interaction between FITC-casein and MtaLon proteins. Changes of FP of FITC-casein upon addition of various MtaLon mutants were plotted in different concentrations. mP, unit for FP. Data are presented as mean with SD (as shown by error bars) of three independent experiments ( $n = 3$ ). Source data are provided as a Source Data file.

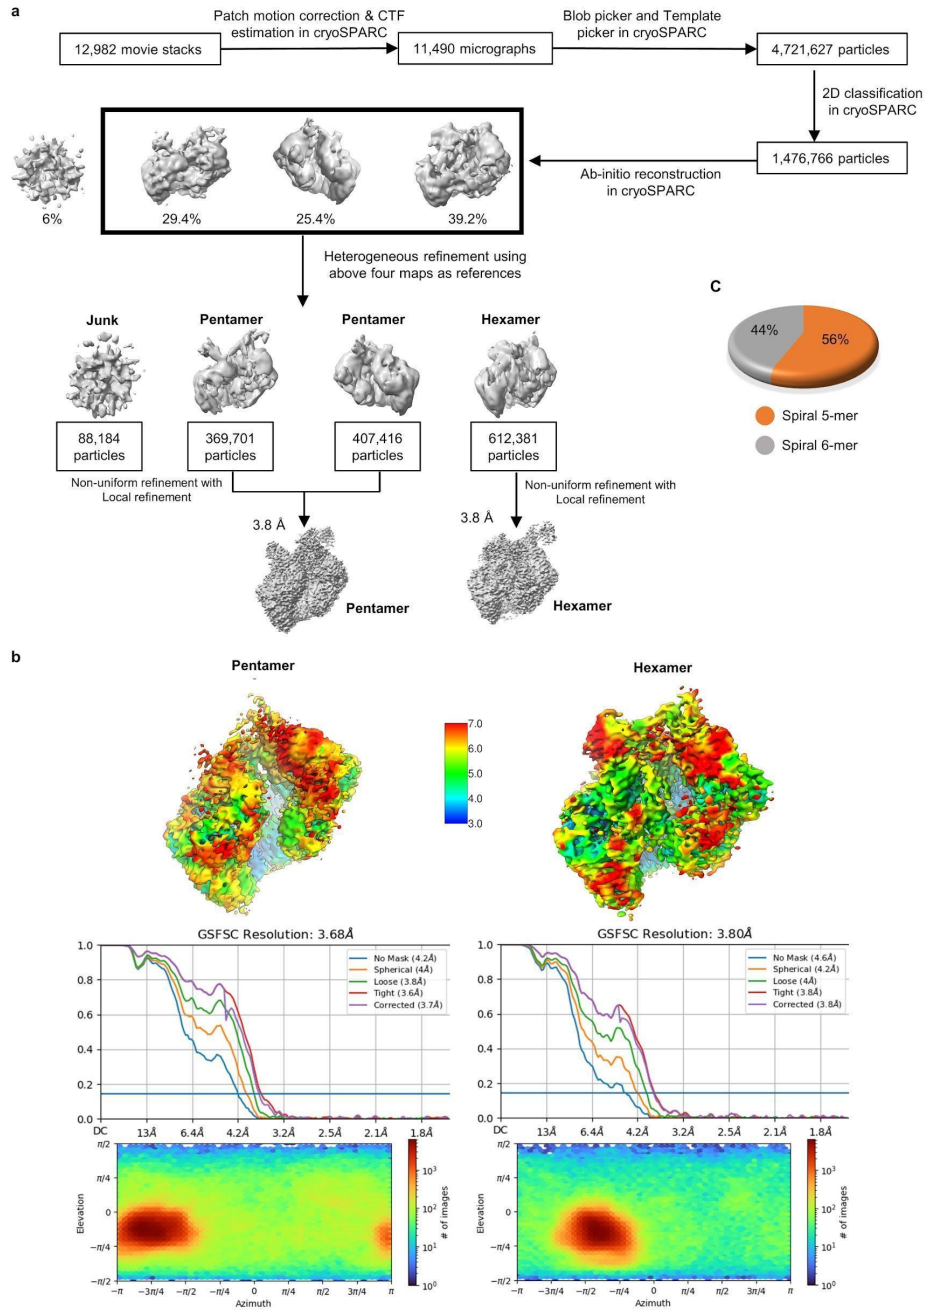

**Supplementary Fig. 2: Single-particle cryo-EM analysis of MtaLon-Y224S:ATP $\gamma$ S. a,** Workflow of the data processing. **b,** Evaluation of the final 3D reconstructions. Top: Resolution maps for the final 3D reconstructions; middle: Gold standard FSC plots for the final 3D reconstructions, calculated in cryoSPARC; bottom: Euler angle distribution of the particle images. **c,** Pie chart showing the ratio of spiral pentamers and spiral hexamers.

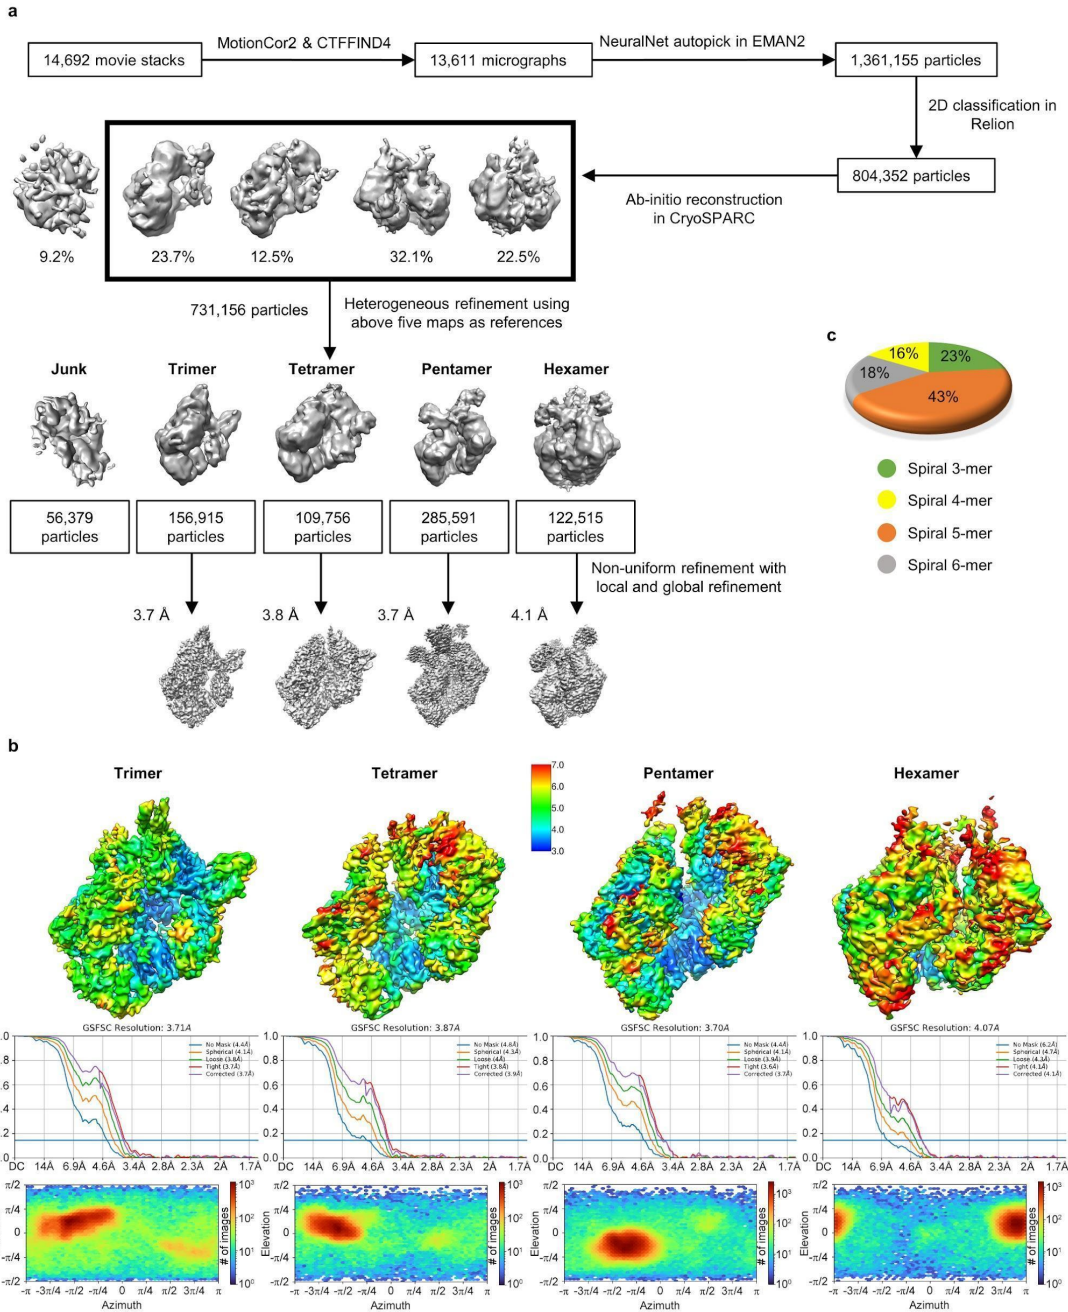

**Supplementary Fig. 3: Single-particle cryo-EM analysis of MtaLon-Apo. a**, Workflow of the data processing. **b**, Evaluation of the final 3D reconstructions. Top: Resolution maps for the final 3D reconstructions; middle: Gold standard 3 FSC plots for the final 3D reconstructions, calculated in cryoSPARC; bottom: Euler angle distribution of the particle images. **c**, Pie chart showing the ratio of different spiral oligomers.

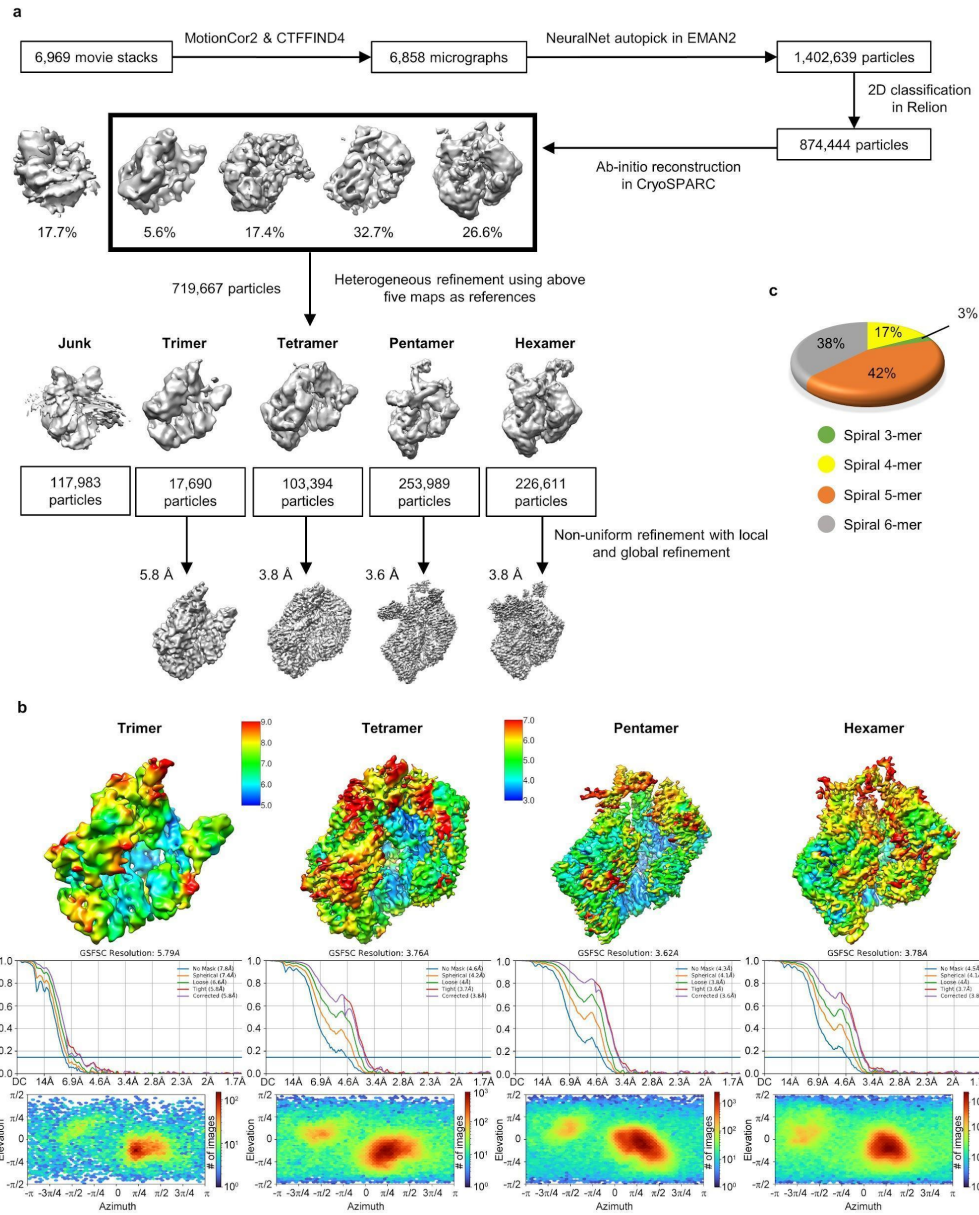

**Supplementary Fig. 4: Single-particle cryo-EM analysis of MtaLon:ADP. a**, Workflow of the data processing. **b**, Evaluation of the final 3D reconstructions. Top: Resolution maps for the final 3D reconstructions, with the color bar shared by all maps except the trimer; middle: Gold standard FSC plots for the final 3D reconstructions, calculated in cryoSPARC; bottom: Euler angle distribution of the particle images. **c**, Pie chart showing the ratio of different spiral oligomers.

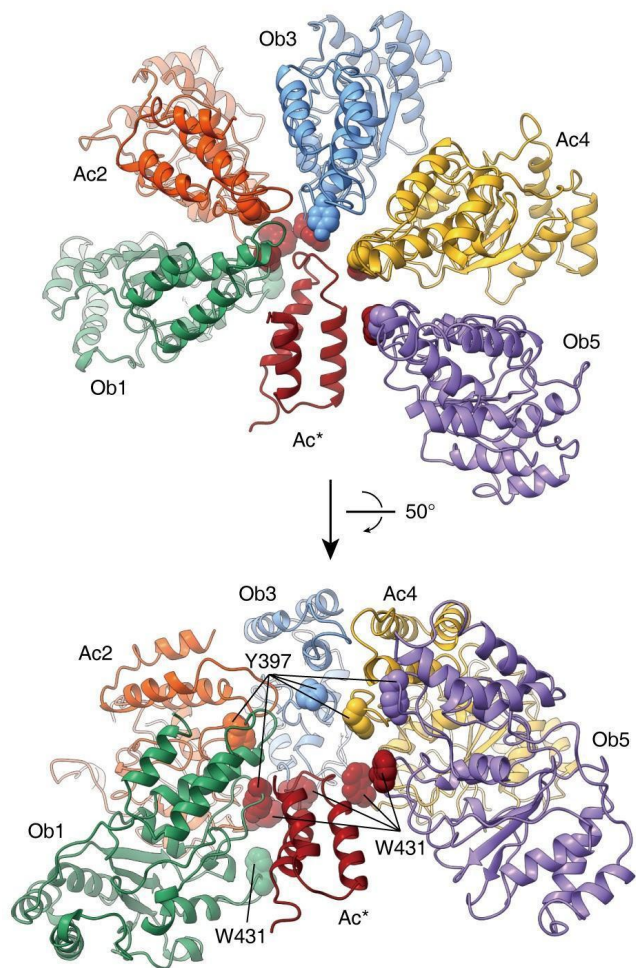

**Supplementary Fig. 5: The substrate-free spiral hexamer forms an autoinhibited conformation.** Two views of the spiral hexamer are shown in ribbon models. For clarity, the NGDs, LHs, and protease domains were omitted. The 3H subdomain of Ac6\* (ribbon in dark red) is shown to occupy the axial position of the spiral organization of five AAA+ domains from protomers 1~5. The pore-loop-I residue Y397 and the pore-loop-II residue W431 are shown in spheres; those whose solvent accessibility is blocked by the 3H subdomain of Ac6\* are colored in dark red.

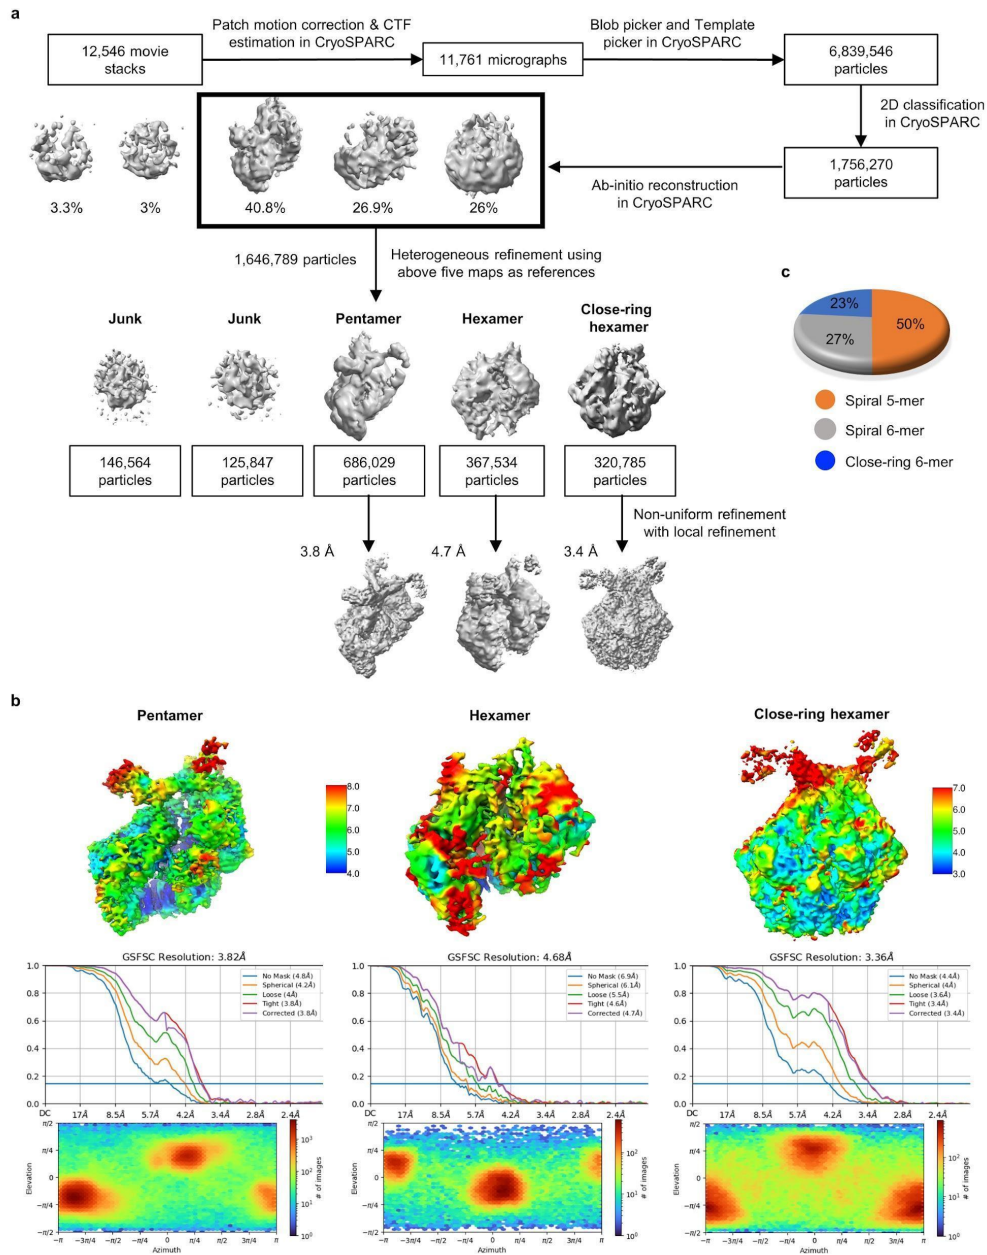

**Supplementary Fig. 6: Single-particle cryo-EM analysis of MtaLon-S678A:casein:ADP. a,** Workflow of the data processing. **b,** Evaluation of the final 3D reconstructions. Top: Resolution maps for the final 3D reconstructions, with the color bar shared by all maps except the close-ring hexamer; middle: Gold standard FSC plots for the final 3D reconstructions, calculated in cryoSPARC; bottom: Euler angle distribution of the particle images. **c,** Pie chart showing the ratio of spiral pentamers, spiral hexamers, and close-ring hexamers.

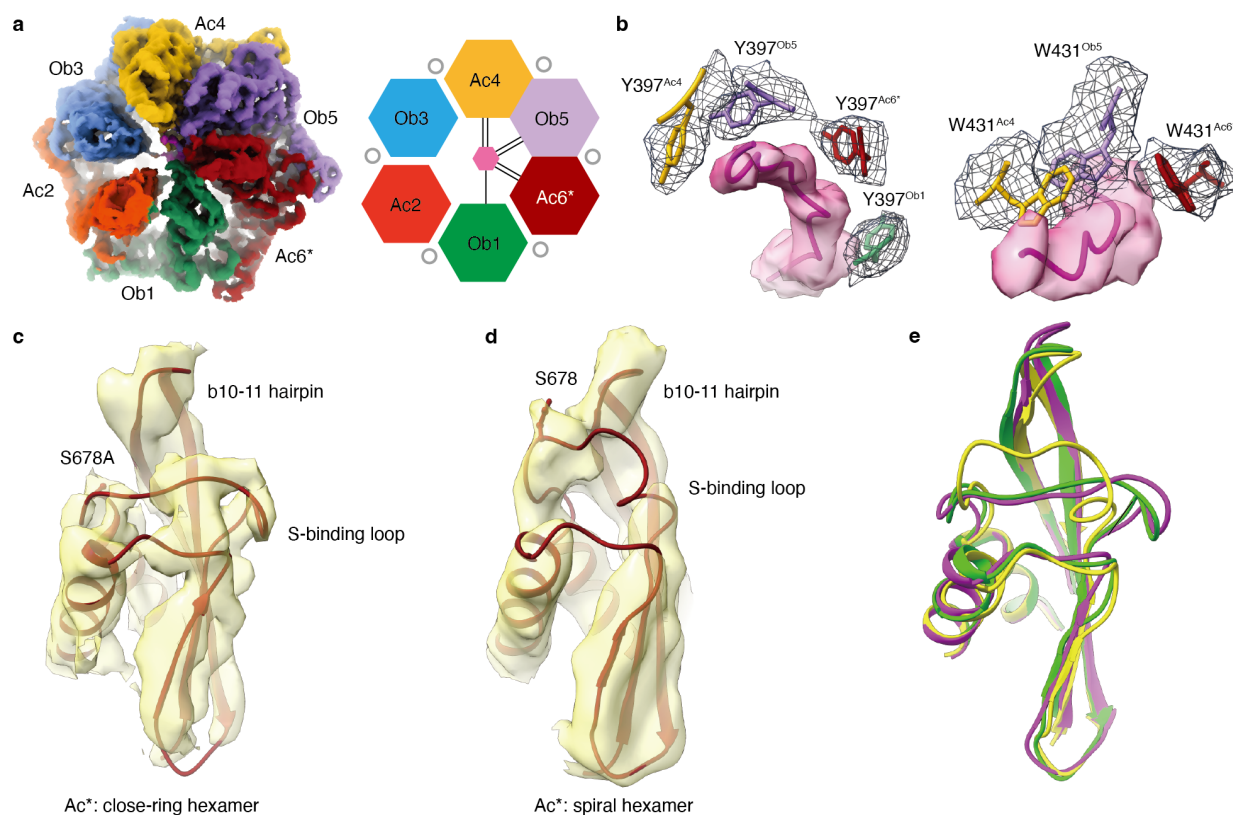

**Supplementary Fig. 7: Structure of the close-ring hexamer of MtaLon-S678A bound to substrate and ADP.** **a**, Top view of the map (left) and cartoon diagram (right) of the close-ring hexamer. The N-terminal regions were omitted for clarity. Gray open circles represent ADP. **b**, Close-up top view of the substrate and the contacting pore-loop residues fit to the map, shown in the same color scheme as **(a)**. **c,d**, Coil models fit to the maps of the proteolytic active sites of the protomers Ac6\* in the substrate-bound close-ring hexamer of MtaLon-S678A:casein-ADP **(c)** and in the substrate-free spiral hexamer of MtaLon-ADP **(d)**. **e**, Superimposition of the proteolytic sites of the protomers Ac6\*, shown in **(c)** and **(d)** (colored in green and yellow, respectively), with the bortezomib-bound proteolytic site of Ac6\* in the close-ring structure of MtaLon:casein-ATP $\gamma$ S (colored in purple; PDB code 7FD4, chain C; bortezomib omitted for clarity).

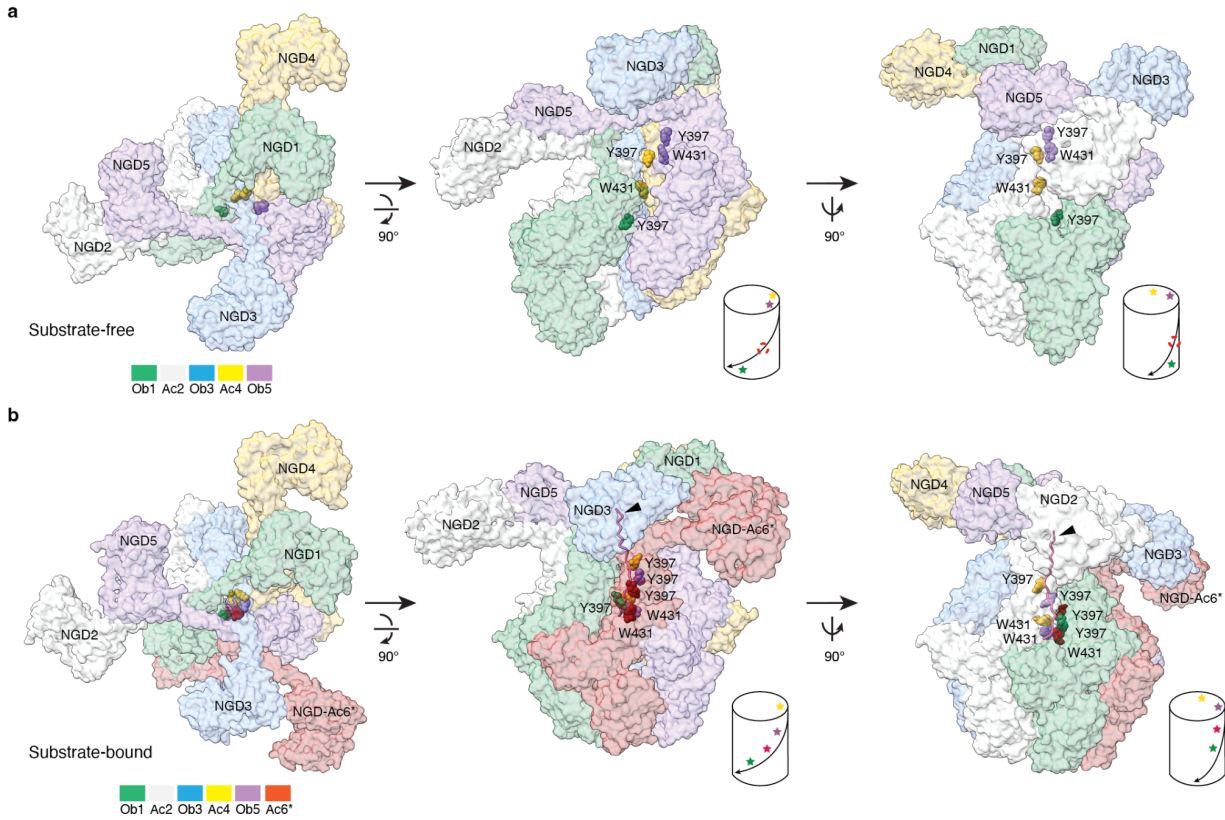

**Supplementary Fig. 8: Distribution of the pore-loop residues in the substrate-free and substrate-bound states of MtaLon.** **a**, The substrate-free pentameric structure is shown in surface representation with 80% transparency. The pore-loop I and II residues (Y397 and W431, respectively) are shown in spheres and colored using the indicated coloring scheme. The cylindrical cartoon illustrates a spiral right-handed trajectory; the star symbols denote the pore-loop-I residues. The dotted circle indicates where Y397 of the sixth protomer Ac6\* may line up on the trajectory upon binding. **b**, The substrate-bound hexameric form of MtaLon-S678A incubated with ADP and the substrate  $\alpha$ -casein is shown in surface representation with 80% transparency. The substrate polypeptide chain is marked by the arrowhead.



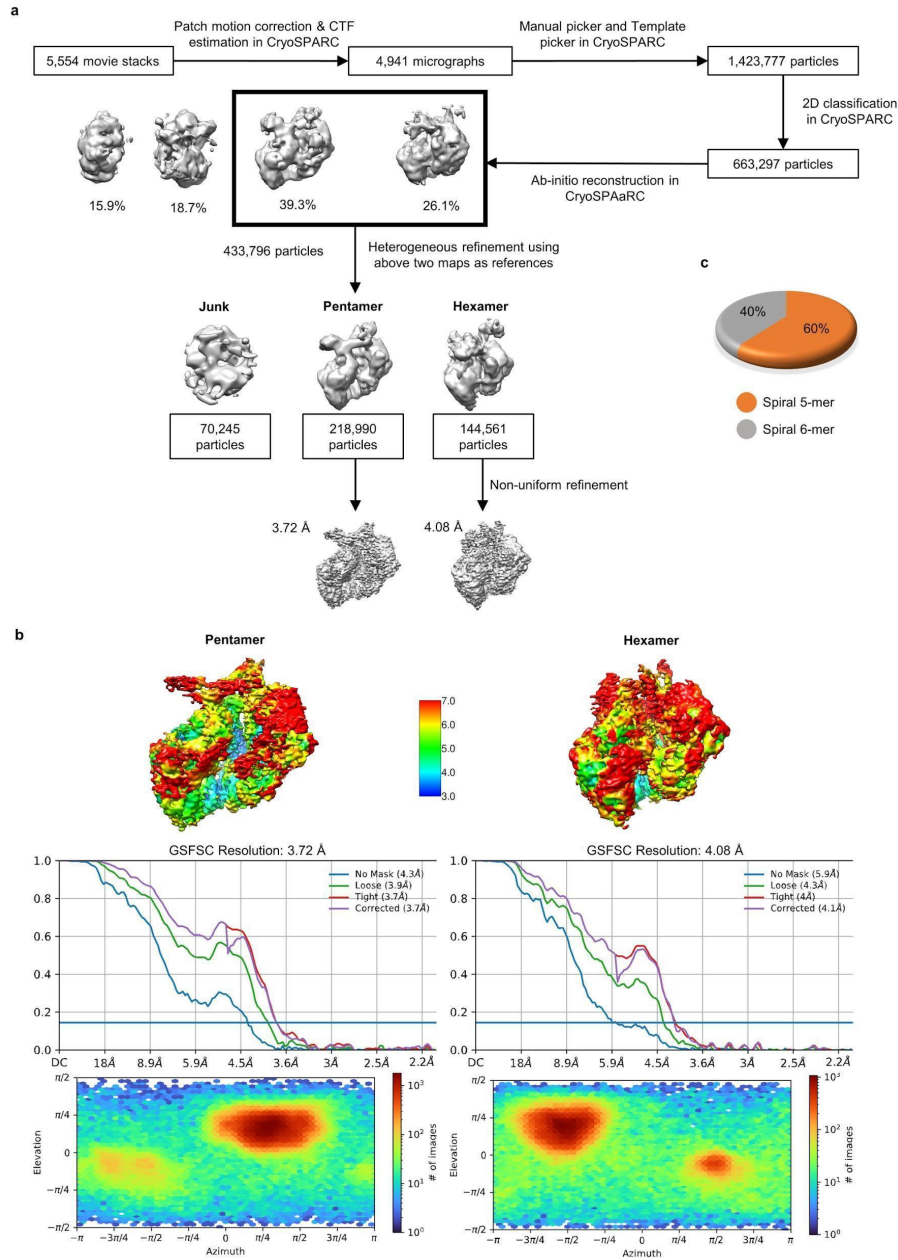

**Supplementary Fig. 9: Single-particle cryo-EM analysis of MtaLon-Y397A/S678A: casein:ATP $\gamma$ S.** **a**, Workflow of the data processing. **b**, Evaluation of the final 3D reconstructions. Top: Resolution maps for the final 3D reconstructions; middle: Gold standard FSC plots for the final 3D reconstructions, calculated in cryoSPARC; bottom: Euler angle distribution of the particle images. **c**, Pie chart showing the ratio of spiral pentamers and spiral hexamers.

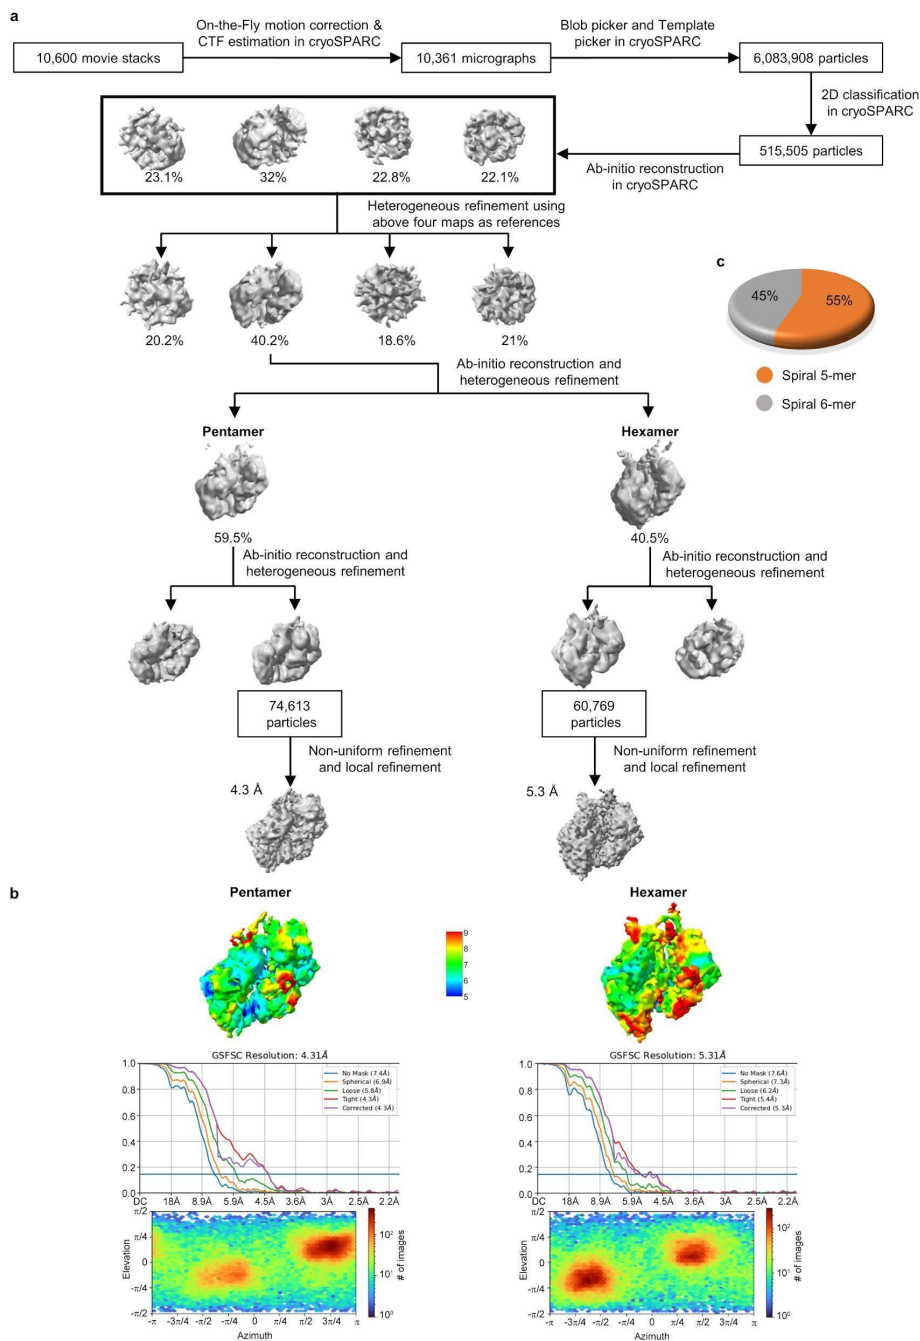

**Supplementary Fig. 10: Single-particle cryo-EM analysis of MtaLon-M217A:casein:ADP.**

**a**, Workflow of the data processing. **b**, Evaluation of the final 3D reconstructions. Top: Resolution maps for the final 3D reconstructions; middle: Gold standard FSC plots for the final 3D reconstructions, calculated in cryoSPARC; bottom: Euler angle distribution of the particle images. **c**, Pie chart showing the ratio of spiral pentamers and spiral hexamers.

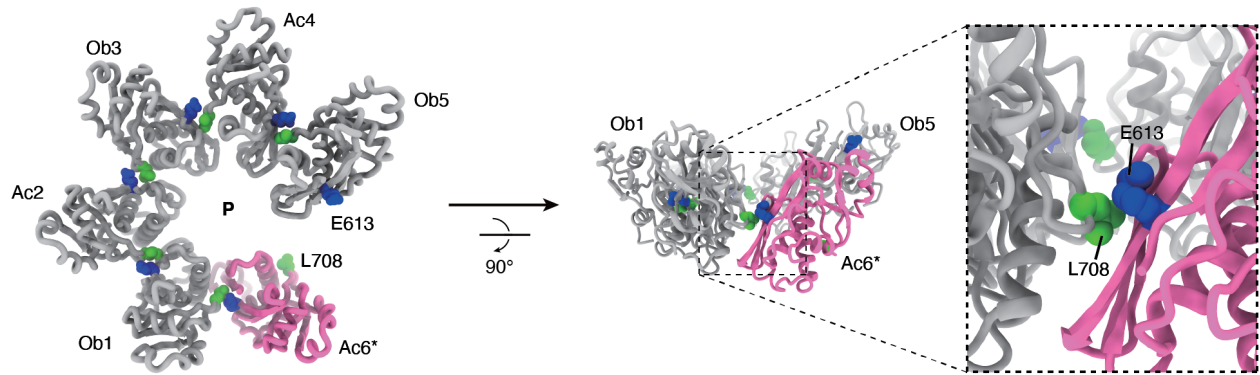

**Supplementary Fig. 11: Interface of the protease domains of MtaLon.** Two views showing the protease domains (P) in the spiral hexamer in ribbons. The interacting residues Glu613 (blue) and Leu708 (green) are highlighted in spheres.

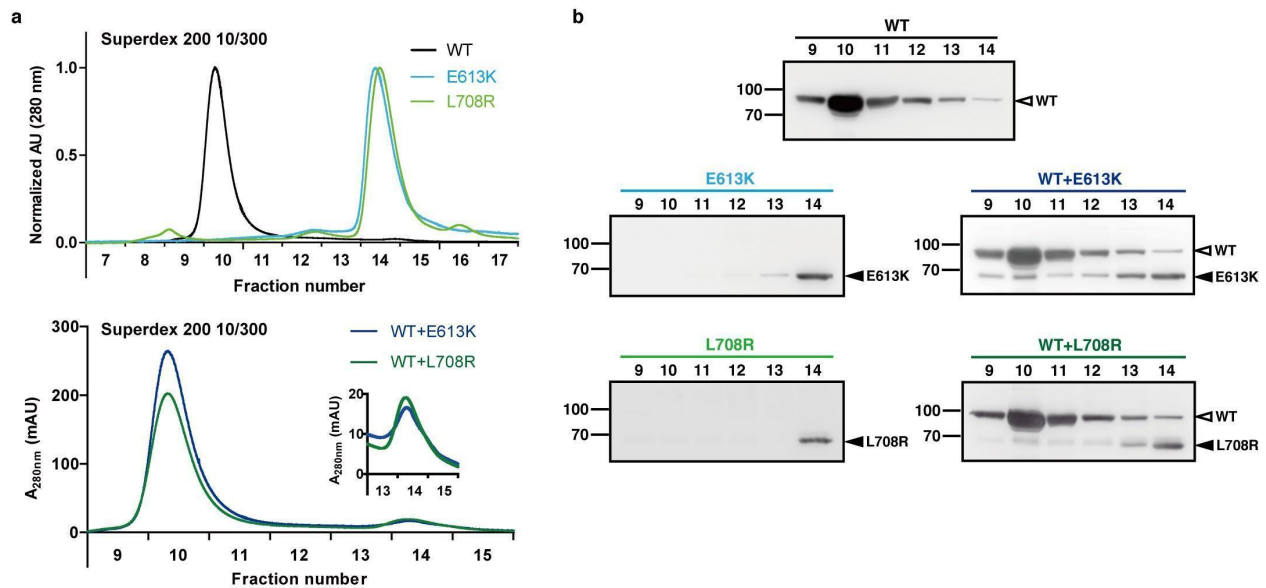

**Supplementary Fig. 12: Binding of two designed monomeric MtaLon mutants to MtaLon-WT.** **a**, The overlay chromatogram of size-exclusion chromatography of MtaLon-WT (WT, 20  $\mu$ M),  $\Delta$ N-E613K (E613K, 15  $\mu$ M), and  $\Delta$ N-L708R (L708R, 15  $\mu$ M), which all carry a C-terminal 6xHis tag, is shown on the top. The overlay chromatogram of E613K and L708R incubated with WT is shown on the bottom. **b**, Western blot analysis of the fractions 9–14 from (a), detected with the 6xHis tag monoclonal antibody. Source data are provided as a Source Data file.

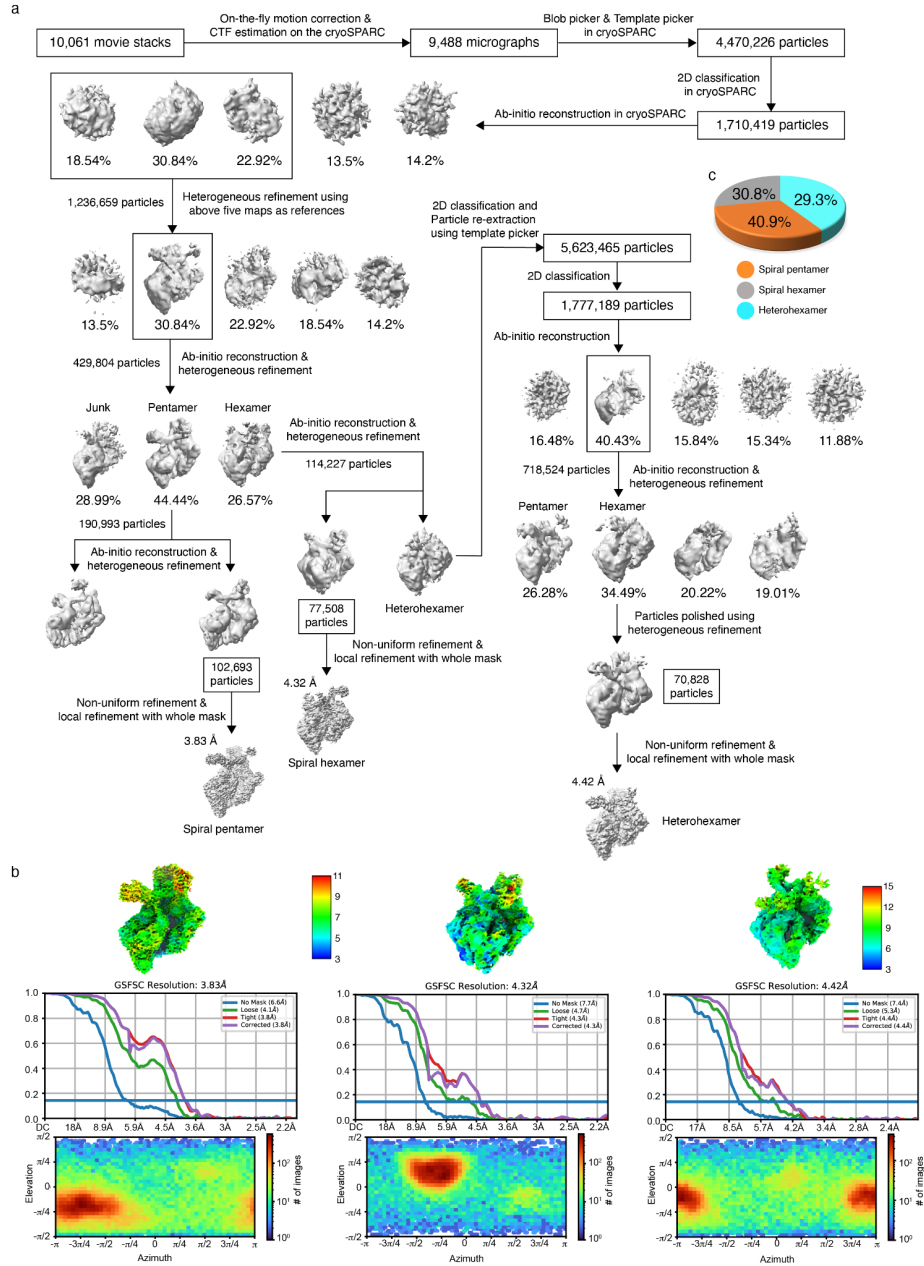

**Supplementary Fig. 13: Single-particle cryo-EM analysis of MtaLon-Y224S:  $\Delta$ N-E613K:ADP.** **a**, Workflow of the data processing. **b**, Evaluation of the final 3D reconstructions. Top: Resolution maps for the final 3D reconstructions; middle: Gold standard FSC plots for the final 3D reconstructions, calculated in cryoSPARC; bottom: Euler angle distribution of the particle images. **c**, Pie chart showing the ratio of spiral penamers, spiral hexamers, and the heterohexamers (the 5+1 heterocomplex with  $\Delta$ N-E613K).

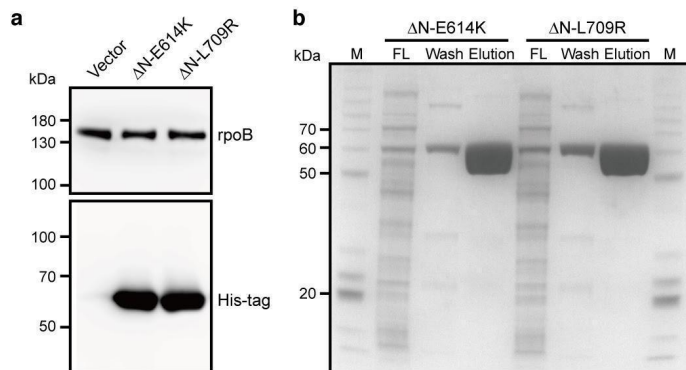

**Supplementary Fig. 14: Protein expression of two monomeric mutants of EcoLon in *E. coli* MG1655 cells.** **a**, Western-blot analysis of the cell lysates of MG1655 cells transformed with the vector, EcoLon- $\Delta$ N-E614K, or - $\Delta$ N-L709R plasmids and induced with 0.5% L-arabinose. Expressions of EcoLon- $\Delta$ N-E614K and - $\Delta$ N-L709R were detected with the 6xHis tag monoclonal antibody. RNA polymerase subunit beta (rpoB) was used for an internal loading control. **b**, Ni-chelation chromatography of recombinant 6xHis-tagged EcoLon- $\Delta$ N-E614K and - $\Delta$ N-L709R expressed in MG1655 cells assessed by Coomassie blue staining. M denotes the molecular weight marker. FL, Wash, and Elution represent samples taken from the flow-through, wash (with 25 mM imidazole), and elution fractions, respectively. Source data are provided as a Source Data file.

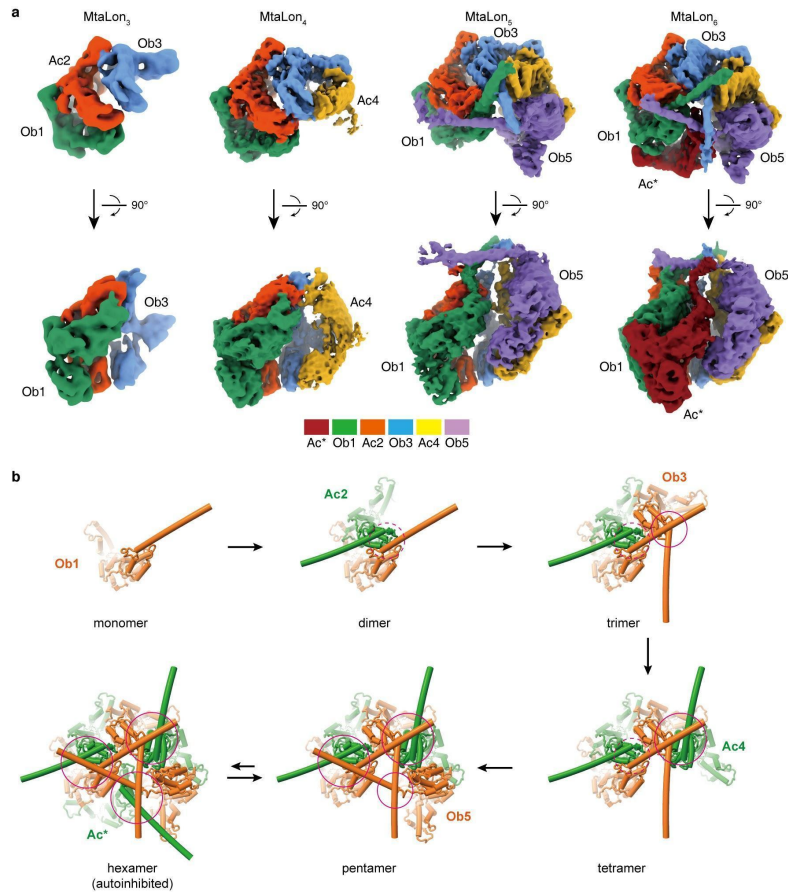

**Supplementary Fig. 15: Assembly of the tensegrity helix triangle by clockwise sequential incorporation of protomers. a,** Cryo-EM maps reconstructed from the MtaLon:ADP data reveal the trimeric, tetrameric, pentameric, and hexameric oligomers in left-handed spiral conformation. To highlight the tensegrity helix triangle (THT), the densities of the NGDs resolved in the maps of the pentamer and the hexamer are not shown in the displayed contour levels. **b,** The proposed assembly sequence is shown in the axial views. The NGDs are omitted for clarity. Dashed circles mark the antiparallel helical interactions involving two LHs; solid circles denote crossover helical interactions. The tensegrity helix triangle is constructed only upon the incorporation of the 5th protomer to form crossover helical interactions at the three vertices. The Ob-protomers and Ac-protomers are colored in orange and green, respectively.

**Supplementary Table 1: Cryo-EM data collection, processing, and model validation of MtaLon-Y224S:ATP $\gamma$ S.**

|                                                   | MtaLon-Y224S:ATP $\gamma$ S                |                |
|---------------------------------------------------|--------------------------------------------|----------------|
| <b>Data collection and processing</b>             |                                            |                |
| Microscope                                        | FEI Titan Krios                            |                |
| Voltage (kV)                                      | 300                                        |                |
| Camera                                            | Gatan K3                                   |                |
| Grids Type                                        | R1.2/1.3 Quantifoil copper grid (200 mesh) |                |
| Sample concentration                              | 0.5 mg/mL                                  |                |
| Magnification                                     | 105,000 $\times$                           |                |
| C2 aperture size ( $\mu$ m)                       | 50                                         |                |
| Objective aperture size ( $\mu$ m)                | None                                       |                |
| Pixel size ( $\text{Å}$ )                         | 0.83 (super-resolution: 0.415)             |                |
| Total exposure ( $e^{-}/\text{Å}^2$ )             | 73.8                                       |                |
| Exposure time (s)                                 | 1.34                                       |                |
| Number of frames per exposure                     | 50                                         |                |
| Energy filter slit width (eV)                     | 18                                         |                |
| Data collection software                          | EPU 2.10                                   |                |
| Number of exposures per hole                      | 2                                          |                |
| Defocus range ( $\mu$ m)                          | -1.2 to -2.0                               |                |
| Number of micrographs collected                   | 12,982                                     |                |
| Number of micrographs used                        | 11,490                                     |                |
| Number of initial particles                       | 4,721,627                                  |                |
| Conformations                                     | <b>Pentamer</b>                            | <b>Hexamer</b> |
| Symmetry                                          | C1                                         | C1             |
| Number of final particles                         | 777,119                                    | 612,381        |
| Resolution (0.143 gold standard FSC, $\text{Å}$ ) | 3.7                                        | 3.8            |
| Local resolution range ( $\text{Å}$ )             | 3 - 7                                      | 3 - 7          |
| <b>Atomic model refinement</b>                    |                                            |                |
| Software                                          | phenix                                     | phenix         |
| Clashscore, all atoms                             | 16.51                                      | 14.04          |
| Poor rotamers (%)                                 | 0.15                                       | 0.13           |
| Favored rotamers (%)                              | 98.98                                      | 98.87          |
| Ramachandran outliers (%)                         | 0.05                                       | 0.02           |



|                          |           |           |
|--------------------------|-----------|-----------|
| Ramachandran favored (%) | 91.52     | 93.6      |
| MolProbity score         | 2.22      | 2.1       |
| Bad bonds (%)            | 0         | 0         |
| Bad angles (%)           | 0.08      | 0.12      |
| CC box                   | 0.81      | 0.80      |
| <b>Accession numbers</b> |           |           |
| EMDB                     | EMD-34000 | EMD-34001 |
| PDB                      | 7YPH      | 7YPI      |

**Supplementary Table 2: Cryo-EM data collection, processing, and model validation of MtaLon-Apo.**

|                                         | MtaLon-Apo                                 |                 |                 |                |
|-----------------------------------------|--------------------------------------------|-----------------|-----------------|----------------|
| <b>Data collection and processing</b>   |                                            |                 |                 |                |
| Microscope                              | Titan Krios G3i                            |                 |                 |                |
| Voltage (kV)                            | 300                                        |                 |                 |                |
| Camera                                  | Thermo Fisher Falcon 4                     |                 |                 |                |
| Grids Type                              | R1.2/1.3 Quantifoil copper grid (200 mesh) |                 |                 |                |
| Sample concentration                    | 0.5 mg/mL                                  |                 |                 |                |
| Magnification                           | 96,000×                                    |                 |                 |                |
| C2 aperture size (μm)                   | 70                                         |                 |                 |                |
| Objective aperture size (μm)            | 100                                        |                 |                 |                |
| Pixel size (Å)                          | 0.82                                       |                 |                 |                |
| Total exposure (e-/Å <sup>2</sup> )     | 48                                         |                 |                 |                |
| Exposure time (s)                       | 5.8                                        |                 |                 |                |
| Number of frames per exposure           | 40                                         |                 |                 |                |
| Energy filter slit width (eV)           | 15                                         |                 |                 |                |
| Data collection software                | EPU 2.7                                    |                 |                 |                |
| Number of exposures per hole            | 6                                          |                 |                 |                |
| Defocus range (μm)                      | -1.0 to -2.5                               |                 |                 |                |
| Number of micrographs collected         | 14,692                                     |                 |                 |                |
| Number of micrographs used              | 13,611                                     |                 |                 |                |
| Number of initial particles             | 1,361,155                                  |                 |                 |                |
| Conformations                           | <b>Trimer</b>                              | <b>Tetramer</b> | <b>Pentamer</b> | <b>Hexamer</b> |
| Symmetry                                | C1                                         | C1              | C1              | C1             |
| Number of final particles               | 156,915                                    | 109,756         | 285,591         | 122,515        |
| Resolution (0.143 gold standard FSC, Å) | 3.7                                        | 3.8             | 3.7             | 4.1            |
| Local resolution range (Å)              | 3 - 7                                      | 3 - 7           | 3 - 7           | 3 - 7          |
| <b>Atomic model refinement</b>          |                                            |                 |                 |                |
| Software                                | phenix                                     | phenix          | phenix          | phenix         |
| Clashscore, all atoms                   | 6.61                                       | 8.84            | 10              | 11.68          |
| Poor rotamers (%)                       | 0.15                                       | 0.34            | 0.96            | 0.59           |
| Favored rotamers (%)                    | 96.01                                      | 96.05           | 94.58           | 95.76          |
| Ramachandran outliers (%)               | 0.13                                       | 0.09            | 0.16            | 0.19           |

|                          |           |           |           |           |
|--------------------------|-----------|-----------|-----------|-----------|
| Ramachandran favored (%) | 88.93     | 87.59     | 88.20     | 90.94     |
| MolProbity score         | 1.94      | 2.08      | 2.12      | 2.10      |
| Bad bonds (%)            | 0.01      | 0.01      | 0.03      | 0.01      |
| Bad angles (%)           | 0.03      | 0.07      | 0.14      | 0.08      |
| CC box                   | 0.86      | 0.87      | 0.82      | 0.84      |
| <b>Accession numbers</b> |           |           |           |           |
| EMDB                     | EMD-34107 | EMD-34108 | EMD-34109 | EMD-34110 |
| PDB                      | 7YUH      | 7YUM      | 7YUP      | 7YUT      |

**Supplementary Table 3: Cryo-EM data collection, processing, and model validation of MtaLon:ADP.**

|                                         | MtaLon:ADP                                 |                 |                 |                |
|-----------------------------------------|--------------------------------------------|-----------------|-----------------|----------------|
| <b>Data collection and processing</b>   |                                            |                 |                 |                |
| Microscope                              | Titan Krios G3i                            |                 |                 |                |
| Voltage (kV)                            | 300                                        |                 |                 |                |
| Camera                                  | Gatan K3                                   |                 |                 |                |
| Grids Type                              | R1.2/1.3 Quantifoil copper grid (200 mesh) |                 |                 |                |
| Sample concentration                    | 0.5 mg/mL                                  |                 |                 |                |
| Magnification                           | 105,000×                                   |                 |                 |                |
| C2 aperture size (μm)                   | 70                                         |                 |                 |                |
| Objective aperture size (μm)            | 100                                        |                 |                 |                |
| Pixel size (Å)                          | 0.82                                       |                 |                 |                |
| Total exposure (e-/Å <sup>2</sup> )     | 60                                         |                 |                 |                |
| Exposure time (s)                       | 1.5                                        |                 |                 |                |
| Number of frames per exposure           | 40                                         |                 |                 |                |
| Energy filter slit width (eV)           | 15                                         |                 |                 |                |
| Data collection software                | EPU 2.7                                    |                 |                 |                |
| Number of exposures per hole            | 6                                          |                 |                 |                |
| Defocus range (μm)                      | -1.0 to -2.5                               |                 |                 |                |
| Number of micrographs collected         | 6,969                                      |                 |                 |                |
| Number of micrographs used              | 6,858                                      |                 |                 |                |
| Number of initial particles             | 1,402,639                                  |                 |                 |                |
| Conformations                           | <b>Trimer</b>                              | <b>Tetramer</b> | <b>Pentamer</b> | <b>Hexamer</b> |
| Symmetry                                | C1                                         | C1              | C1              | C1             |
| Number of final particles               | 17,690                                     | 103,394         | 253,989         | 226,611        |
| Resolution (0.143 gold standard FSC, Å) | 5.8                                        | 3.8             | 3.6             | 3.8            |
| Local resolution range (Å)              | 5 - 9                                      | 3 - 7           | 3 - 7           | 3 - 7          |
| <b>Atomic model refinement</b>          |                                            |                 |                 |                |
| Software                                | phenix                                     | phenix          | phenix          | phenix         |
| Clashscore, all atoms                   | 18.8                                       | 15.54           | 15.89           | 14.63          |
| Poor rotamers (%)                       | 0.15                                       | 0.06            | 0.15            | 0.26           |
| Favored rotamers (%)                    | 96.84                                      | 99.77           | 99.38           | 99.38          |
| Ramachandran outliers (%)               | 0                                          | 0               | 0.05            | 0.09           |

|                          |           |           |           |           |
|--------------------------|-----------|-----------|-----------|-----------|
| Ramachandran favored (%) | 91.01     | 93.73     | 91.73     | 93.58     |
| MolProbity score         | 2.29      | 2.11      | 2.20      | 2.09      |
| Bad bonds (%)            | 0         | 0         | 0         | 0         |
| Bad angles (%)           | 0.04      | 0.01      | 0.03      | 0.02      |
| CC box                   | 0.89      | 0.78      | 0.81      | 0.82      |
| <b>Accession numbers</b> |           |           |           |           |
| EMDB                     | EMD-34111 | EMD-34112 | EMD-34113 | EMD-34114 |
| PDB                      | 7YUU      | 7YUV      | 7YUW      | 7YUX      |

**Supplementary Table 4: Cryo-EM data collection, processing, and model validation of MtaLon-S678A:casein:ADP.**

|                                         |                                            | MtaLon-S678A:casein:ADP |                      |        |
|-----------------------------------------|--------------------------------------------|-------------------------|----------------------|--------|
| <b>Data collection and processing</b>   |                                            |                         |                      |        |
| Microscope                              | FEI Titan Krios                            |                         |                      |        |
| Voltage (kV)                            | 300                                        |                         |                      |        |
| Camera                                  | Gatan K3                                   |                         |                      |        |
| Grids Type                              | R1.2/1.3 Quantifoil copper grid (200 mesh) |                         |                      |        |
| Sample concentration                    | 0.5 mg/mL                                  |                         |                      |        |
| Magnification                           | 81,000×                                    |                         |                      |        |
| C2 aperture size (μm)                   | 50                                         |                         |                      |        |
| Objective aperture size (μm)            | None                                       |                         |                      |        |
| Pixel size (Å)                          | 1.061 (super-resolution: 0.5305)           |                         |                      |        |
| Total exposure (e-/Å <sup>2</sup> )     | 59                                         |                         |                      |        |
| Exposure time (s)                       | 2.52                                       |                         |                      |        |
| Number of frames per exposure           | 60                                         |                         |                      |        |
| Energy filter slit width (eV)           | 20                                         |                         |                      |        |
| Data collection software                | EPU 2.10                                   |                         |                      |        |
| Number of exposures per hole            | 2                                          |                         |                      |        |
| Defocus range (μm)                      | -1.4 to -2.2                               |                         |                      |        |
| Number of micrographs collected         | 12,546                                     |                         |                      |        |
| Number of micrographs used              | 11,716                                     |                         |                      |        |
| Number of initial particles             | 1,756,270                                  |                         |                      |        |
| Conformations                           | <b>Pentamer</b>                            | <b>Hexamer</b>          | <b>Close-hexamer</b> |        |
| Symmetry                                | C1                                         | C1                      | C1                   |        |
| Number of final particles               | 486,028                                    | 100,882                 | 207,760              |        |
| Resolution (0.143 gold standard FSC, Å) | 3.8                                        | 4.7                     | 3.4                  |        |
| Local resolution range (Å)              | 4 - 8                                      | 4 - 8                   | 3 - 7                |        |
| <b>Atomic model refinement</b>          |                                            |                         |                      |        |
| Software                                | phenix                                     |                         |                      | phenix |
| Clashscore, all atoms                   | 19                                         |                         |                      | 20.29  |
| Poor rotamers (%)                       | 0.12                                       |                         |                      | 0.46   |
| Favored rotamers (%)                    | 98.73                                      |                         |                      | 97.54  |
| Ramachandran outliers (%)               | 0.08                                       |                         |                      | 0.06   |

|                          |           |           |           |
|--------------------------|-----------|-----------|-----------|
| Ramachandran favored (%) | 91.47     |           | 95.3      |
| MolProbity score         | 2.28      |           | 2.13      |
| Bad bonds (%)            | 0         |           | 0.03      |
| Bad angles (%)           | 0.1       |           | 0.04      |
| CC box                   | 0.87      |           | 0.80      |
| <b>Accession numbers</b> |           |           |           |
| EMDB                     | EMD-34002 | EMD-34004 | EMD-34003 |
| PDB                      | 7YPJ      | N/A       | 7YPK      |

**Supplementary Table 5: Cryo-EM data collection, processing, and model validation of MtaLon-Y397A/S678A:casein:ATP $\gamma$ S.**

|                                                   |                                            | MtaLon-Y397A/S678A:casein:ATP $\gamma$ S |  |
|---------------------------------------------------|--------------------------------------------|------------------------------------------|--|
| <b>Data collection and processing</b>             |                                            |                                          |  |
| Microscope                                        | FEI Titan Krios                            |                                          |  |
| Voltage (kV)                                      | 300                                        |                                          |  |
| Camera                                            | Gatan K3                                   |                                          |  |
| Grids Type                                        | R1.2/1.3 Quantifoil copper grid (200 mesh) |                                          |  |
| Sample concentration                              | 0.5 mg/mL                                  |                                          |  |
| Magnification                                     | 81,000 $\times$                            |                                          |  |
| C2 aperture size ( $\mu$ m)                       | 50                                         |                                          |  |
| Objective aperture size ( $\mu$ m)                | None                                       |                                          |  |
| Pixel size ( $\text{Å}$ )                         | 1.061 (super-resolution: 0.5305)           |                                          |  |
| Total exposure ( $e^{-}/\text{Å}^2$ )             | 48                                         |                                          |  |
| Exposure time (s)                                 | 2                                          |                                          |  |
| Number of frames per exposure                     | 50                                         |                                          |  |
| Energy filter slit width (eV)                     | 18                                         |                                          |  |
| Data collection software                          | EPU 2.10                                   |                                          |  |
| Number of exposures per hole                      | 2                                          |                                          |  |
| Defocus range ( $\mu$ m)                          | -1.4 to -2.2                               |                                          |  |
| Number of micrographs collected                   | 5,554                                      |                                          |  |
| Number of micrographs used                        | 4,941                                      |                                          |  |
| Number of initial particles                       | 1,423,777                                  |                                          |  |
| Conformations                                     | <b>Pentamer</b>                            | <b>Hexamer</b>                           |  |
| Symmetry                                          | C1                                         | C1                                       |  |
| Number of final particles                         | 218,990                                    | 144,561                                  |  |
| Resolution (0.143 gold standard FSC, $\text{Å}$ ) | 3.72                                       | 4.08                                     |  |
| Local resolution range ( $\text{Å}$ )             | 3 - 7                                      | 3 - 7                                    |  |
| <b>Accession numbers</b>                          |                                            |                                          |  |
| EMDB                                              | EMD-34005                                  | EMD-34006                                |  |



**Supplementary Table 6: Cryo-EM data collection, processing, and model validation of MtaLon-M217A:casein:ADP.**

|                                         |                                            | MtaLon-M217:casein:ADP |  |
|-----------------------------------------|--------------------------------------------|------------------------|--|
| <b>Data collection and processing</b>   |                                            |                        |  |
| Microscope                              | FEI Titan Krios                            |                        |  |
| Voltage (kV)                            | 300                                        |                        |  |
| Camera                                  | Gatan K3                                   |                        |  |
| Grids Type                              | R1.2/1.3 Quantifoil copper grid (200 mesh) |                        |  |
| Sample concentration                    | 1 mg/mL                                    |                        |  |
| Magnification                           | 81,000×                                    |                        |  |
| C2 aperture size (μm)                   | 50                                         |                        |  |
| Objective aperture size (μm)            | None                                       |                        |  |
| Pixel size (Å)                          | 1.061 (super-resolution: 0.5305)           |                        |  |
| Total exposure (e-/Å <sup>2</sup> )     | 49                                         |                        |  |
| Exposure time (s)                       | 2                                          |                        |  |
| Number of frames per exposure           | 50                                         |                        |  |
| Energy filter slit width (eV)           | 18                                         |                        |  |
| Data collection software                | EPU 2.10                                   |                        |  |
| Number of exposures per hole            | 2                                          |                        |  |
| Defocus range (μm)                      | -1.4 to -2.2                               |                        |  |
| Number of micrographs collected         | 10,600                                     |                        |  |
| Number of micrographs used              | 10,361                                     |                        |  |
| Number of initial particles             | 1,123,198                                  |                        |  |
| Conformations                           | <b>Pentamer</b>                            | <b>Hexamer</b>         |  |
| Symmetry                                | C1                                         | C1                     |  |
| Number of final particles               | 74,613                                     | 60,769                 |  |
| Resolution (0.143 gold standard FSC, Å) | 4.3                                        | 5.3                    |  |
| Local resolution range (Å)              | 5 - 9                                      | 5 - 9                  |  |
| <b>Accession numbers</b>                |                                            |                        |  |
| EMDB                                    | EMD-34116                                  | EMD-34117              |  |

**Supplementary Table 7: Cryo-EM data collection, processing, and model validation of MtaLon-Y224S:ΔN-E613K:ADP.**

|                                         |                                            | MtaLon-Y224S:ΔN-E613K:ADP |                          |        |
|-----------------------------------------|--------------------------------------------|---------------------------|--------------------------|--------|
| <b>Data collection and processing</b>   |                                            |                           |                          |        |
| Microscope                              | FEI Titan Krios                            |                           |                          |        |
| Voltage (kV)                            | 300                                        |                           |                          |        |
| Camera                                  | Gatan K3                                   |                           |                          |        |
| Grids Type                              | R1.2/1.3 Quantifoil copper grid (200 mesh) |                           |                          |        |
| Sample concentration                    | 0.5 mg/mL                                  |                           |                          |        |
| Magnification                           | 81,000×                                    |                           |                          |        |
| C2 aperture size (μm)                   | 50                                         |                           |                          |        |
| Objective aperture size (μm)            | None                                       |                           |                          |        |
| Pixel size (Å)                          | 1.061 (super-resolution: 0.5305)           |                           |                          |        |
| Total exposure (e-/Å <sup>2</sup> )     | 52                                         |                           |                          |        |
| Exposure time (s)                       | 1.8                                        |                           |                          |        |
| Number of frames per exposure           | 50                                         |                           |                          |        |
| Energy filter slit width (eV)           | 10                                         |                           |                          |        |
| Data collection software                | EPU 3.3.1.5184REL                          |                           |                          |        |
| Number of exposures per hole            | 2                                          |                           |                          |        |
| Defocus range (μm)                      | -1.4 to -2.2                               |                           |                          |        |
| Number of micrographs collected         | 10,061                                     |                           |                          |        |
| Number of micrographs used              | 9,488                                      |                           |                          |        |
| Number of initial particles             | 1,710,419                                  |                           |                          |        |
| Conformations                           | <b>Pentamer</b>                            | <b>Hexamer</b>            | <b>5+1 heterocomplex</b> |        |
| Symmetry                                | C1                                         | C1                        | C1                       |        |
| Number of final particles               | 102,693                                    | 77,508                    | 70,828                   |        |
| Resolution (0.143 gold standard FSC, Å) | 3.8                                        | 4.3                       | 4.4                      |        |
| Local resolution range (Å)              | 3 - 11                                     | 3 - 11                    | 4 - 15                   |        |
| <b>Atomic model refinement</b>          |                                            |                           |                          |        |
| Software                                |                                            |                           |                          | phenix |
| Clashscore, all atoms                   |                                            |                           |                          | 17.66  |
| Poor rotamers (%)                       |                                            |                           |                          | 0.05   |
| Favored rotamers (%)                    |                                            |                           |                          | 98.83  |
| Ramachandran outliers (%)               |                                            |                           |                          | 0.02   |

|                          |           |           |           |
|--------------------------|-----------|-----------|-----------|
| Ramachandran favored (%) |           |           | 93.09     |
| MolProbity score         |           |           | 2.19      |
| Bad bonds (%)            |           |           | 0         |
| Bad angles (%)           |           |           | 0.06      |
| CC box                   |           |           | 0.86      |
| <b>Accession numbers</b> |           |           |           |
| EMDB                     | EMD-36865 | EMD-36866 | EMD-36867 |
| PDB                      | N/A       | N/A       | 8K3Y      |
